# Supplementary material
Source: HighWire-hosted journal article supplement (https://jcp.bmj.com/highwire/filestream/198250/field_highwire_adjunct_files/0/jcp-2023-208875supp001_data_supplement.pdf)
Supplement: jcp-2023-208875supp001_data_supplement.pdf [file jcp-2023-208875supp001_data_supplement.pdf]

SUPPLEMENTAL MATERIAL FOR: Autopsy Findings from Patients Diagnosed with COVID-19 Demonstrate Unique Morphologic Patterns in Bone

Marrow and Lymph Node

AUTHORS: Ali AlJabban, Mark G. Evans, Geoffrey G. Fell, Jack P. Guccione, Robert A. Edwards, Geraldine S. Pinkus, Robert F. Padera, Olga

Pozdnyakova, Annette S. Kim

Supplemental Figure 1.

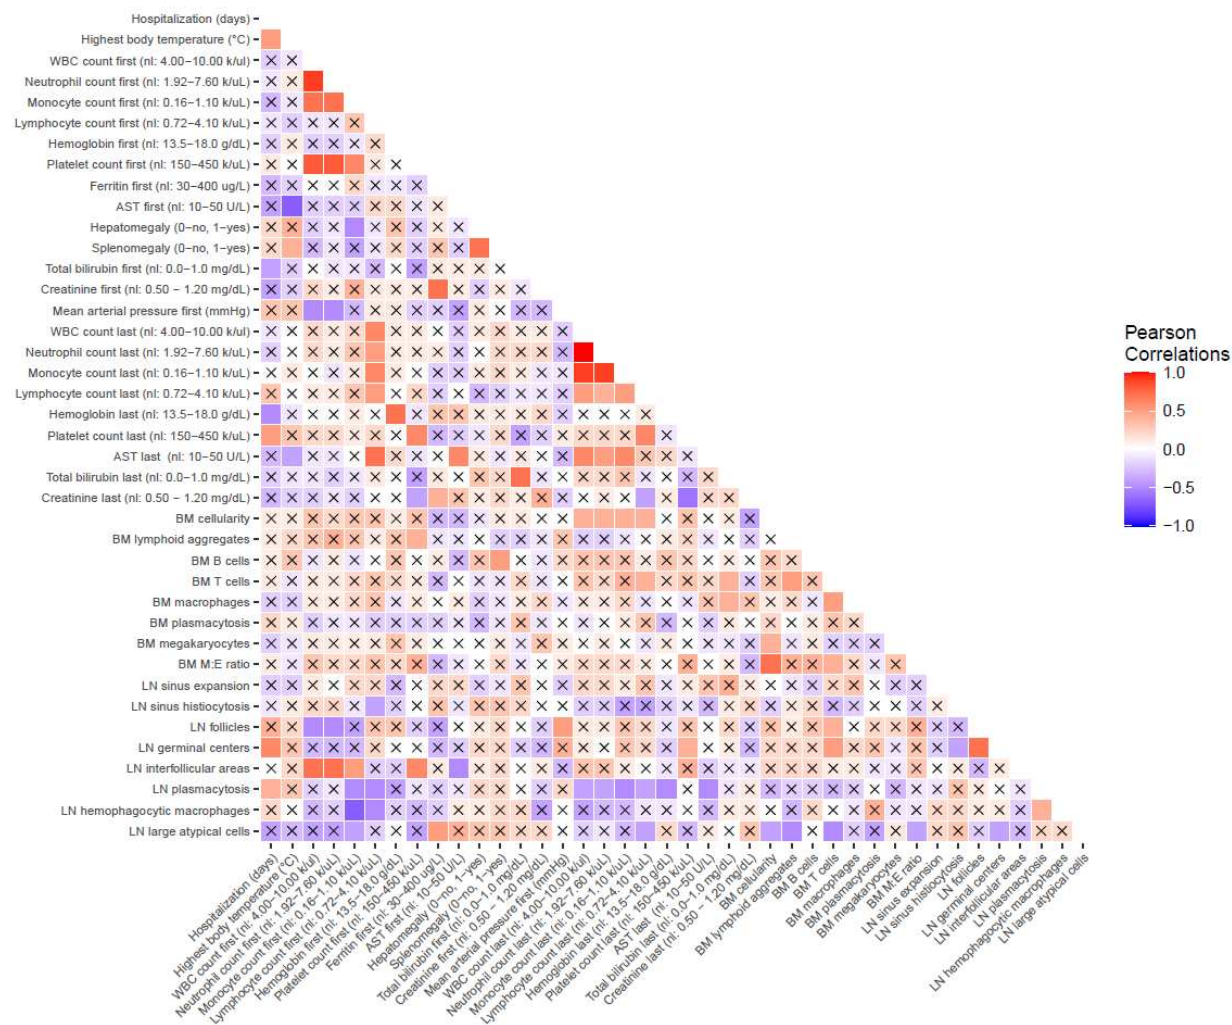

Figure Legend: The heatmap represents all pairwise comparisons, excluding the diagonal, between the scaled and centered clinical, morphological, and hematological parameters measured in our sample of the patients with severe COVID. All pairwise comparisons were estimated as Pearson correlation coefficients. The range of these coefficients spans from -1 in blue, representing a negative correlation, to +1 in red, representing a positive correlation. No correlation, a coefficient of 0, is represented by white. The significance of these pairwise comparison is indicated by their obfuscation - that is all non-significant comparisons are labeled with an "X". Significance was declared at the 5% type I error using a t-test.

Supplementary Table 1: Factors associated with BM hemophagocytic macrophages

|                                                  |                                             | Median*                       |           | Wilcoxon Rank-Sum Test |                    |                    |         |       |
|--------------------------------------------------|---------------------------------------------|-------------------------------|-----------|------------------------|--------------------|--------------------|---------|-------|
|                                                  |                                             | BM Hemophagocytic macrophages |           | Difference             | 95% CI Lower Bound | 95% CI Upper Bound | p-value | FDR   |
|                                                  |                                             | Yes (N=9)                     | No (N=16) |                        |                    |                    |         |       |
| Overall Hospitalization parameters               | Hospitalization (days)                      | 20.00                         | 9.50      | -8.34                  | -16.00             | 0.00               | 0.050   | 0.570 |
|                                                  | Highest body temperature (°C)               | 39.60                         | 38.90     | -0.70                  | -1.30              | 0.30               | 0.125   | 0.752 |
| Laboratory Parameters at initial hospitalization | WBC count first (nl: 4.00-10.00 k/uL)       | 4.83                          | 8.05      | 2.07                   | -1.96              | 5.32               | 0.419   | 0.752 |
|                                                  | Neutrophil count first (nl: 1.92-7.60 k/uL) | 3.30                          | 6.12      | 2.30                   | -1.04              | 4.48               | 0.388   | 0.752 |
|                                                  | Monocyte count first (nl: 0.16-1.10 k/uL)   | 0.25                          | 0.49      | 0.17                   | -0.11              | 0.57               | 0.350   | 0.752 |
|                                                  | Lymphocyte count first (nl: 0.72-4.10 k/uL) | 0.60                          | 0.82      | 0.21                   | -0.23              | 0.80               | 0.350   | 0.752 |
|                                                  | Hemoglobin first (nl: 13.5-18.0 g/dL)       | 12.40                         | 13.35     | 1.00                   | -3.50              | 3.50               | 0.552   | 0.807 |
|                                                  | Platelet count first (nl: 150-450 k/uL)     | 128.00                        | 164.50    | 17.50                  | -39.00             | 73.00              | 0.637   | 0.807 |
|                                                  | Ferritin first (nl: 30-400 ug/L)            | 266.00                        | 687.00    | 324.50                 | -92.00             | 1149.00            | 0.179   | 0.752 |
|                                                  | AST first (nl: 1+BS:1480-50 U/L)            | 35.00                         | 44.00     | 10.00                  | -13.00             | 59.00              | 0.428   | 0.752 |
|                                                  | Total bilirubin first (nl: 0.0-1.0 mg/dL)   | 0.50                          | 0.40      | -0.20                  | -1.40              | 0.10               | 0.391   | 0.752 |
|                                                  | Triglyceride first (nl: 35-150 mg/dL)       | 258.50                        | 235.00    | 1.41                   | -249.00            | 205.00             | 1.000   | 1.000 |
|                                                  | Creatinine first (nl: 0.50 - 1.20 mg/dL)    | 1.01                          | 1.36      | 0.24                   | -0.36              | 1.42               | 0.411   | 0.752 |
|                                                  | C-reactive protein first (nl: 0-10 mg/L)    | 107.10                        | 72.45     | 7.40                   | -97.90             | 132.50             | 0.904   | 0.996 |
|                                                  | INR first (nl: 0.9-1.1)                     | 1.10                          | 1.20      | 0.05                   | -0.40              | 0.20               | 0.636   | 0.807 |
|                                                  | Fibrinogen first (nl: 200-450 mg/dL)        | 544.50                        | 561.50    | -117.50                | -280.00            | 122.00             | 0.624   | 0.807 |
| Clinical Parameters at initial hospitalization   | FiO2 first (%)                              | 60.00                         | 60.00     | 0.00                   | -30.00             | 50.00              | 1.000   | 1.000 |
|                                                  | Mean arterial pressure first (mmHg)         | 91.00                         | 93.00     | 1.00                   | -15.00             | 15.00              | 1.000   | 1.000 |
|                                                  | PaO2 first (nl: 65-95 mmHg)                 | 99.00                         | 88.00     | -26.00                 | -72.00             | 9.00               | 0.174   | 0.752 |
|                                                  | SOFA first                                  | 6.50                          | 10.00     | 3.00                   | -3.00              | 9.00               | 0.343   | 0.752 |
| Laboratory Parameters at Demise                  | WBC count last (nl: 4.00-10.00 k/uL)        | 11.65                         | 11.92     | 0.20                   | -5.98              | 6.84               | 1.000   | 1.000 |
|                                                  | Neutrophil count last (nl: 1.92-7.60 k/uL)  | 8.36                          | 8.92      | 0.51                   | -4.93              | 6.25               | 1.000   | 1.000 |
|                                                  | Hepatomegaly (0-no, 1-yes)                  | 1.00                          | 0.00      | -1.00                  | -1.00              | 0.00               | 0.601   | 0.807 |
|                                                  | Splenomegaly (0-no, 1-yes)                  | 1.00                          | 1.00      | 0.00                   | -1.00              | 0.00               | 0.307   | 0.752 |
|                                                  | Monocyte count last (nl: 0.16-1.10 k/uL)    | 0.81                          | 0.41      | -0.29                  | -0.68              | 0.23               | 0.371   | 0.752 |
|                                                  | Lymphocyte count last (nl: 0.72-4.10 k/uL)  | 1.18                          | 0.79      | -0.18                  | -1.01              | 0.59               | 0.571   | 0.807 |
|                                                  | Hemoglobin last (nl: 13.5-18.0 g/dL)        | 8.50                          | 9.60      | 1.00                   | -0.60              | 3.80               | 0.325   | 0.752 |
|                                                  | Platelet count last (nl: 150-450 k/uL)      | 259.00                        | 160.00    | -73.00                 | -206.00            | 90.00              | 0.446   | 0.752 |
|                                                  | Ferritin last (nl: 30-400 ug/L)             | 612.00                        | 1669.00   | 1010.50                | 86.00              | 7296.00            | 0.028   | 0.424 |
|                                                  | AST last (nl: 10-50 U/L)                    | 34.00                         | 74.50     | 39.89                  | 2.00               | 96.00              | 0.023   | 0.424 |
|                                                  | Total bilirubin last (nl: 0.0-1.0 mg/dL)    | 0.50                          | 0.60      | -0.10                  | -3.40              | 0.60               | 0.568   | 0.807 |
|                                                  | Triglyceride last (nl: 35-150 mg/dL)        | 212.00                        | 252.00    | 73.50                  | -98.00             | 301.00             | 0.456   | 0.752 |
|                                                  | Creatinine last (nl: 0.50 - 1.20 mg/dL)     | 1.49                          | 2.75      | 0.75                   | -0.64              | 2.08               | 0.245   | 0.752 |
|                                                  | C-reactive protein last (nl: 0-10 mg/L)     | 44.40                         | 124.30    | 73.80                  | -61.70             | 255.60             | 0.124   | 0.752 |
| INR last (nl: 0.9-1.1)                           | 1.20                                        | 1.45                          | 0.20      | -0.22                  | 0.50               | 0.259              | 0.752   |       |
| Fibrinogen last (nl: 200-450 mg/dL)              | 664.00                                      | 483.00                        | -169.50   | -358.00                | 30.00              | 0.152              | 0.752   |       |
| Clinical Parameters at Demise                    | FiO2 last (%)                               | 55.25                         | 60.00     | 0.01                   | -30.00             | 40.00              | 0.765   | 0.909 |
|                                                  | Mean arterial pressure last (mmHg)          | 59.50                         | 78.00     | 7.00                   | -15.00             | 46.00              | 0.491   | 0.778 |
|                                                  | PaO2 last (nl: 65-95 mmHg)                  | 80.00                         | 87.00     | -3.85                  | -50.00             | 31.00              | 0.814   | 0.947 |
|                                                  | SOFA last                                   | 9.50                          | 13.00     | 2.00                   | -5.00              | 7.00               | 0.237   | 0.752 |
| Autopsy BM findings                              | BM cellularity                              | 80.00                         | 72.50     | -5.00                  | -25.00             | 5.00               | 0.196   | 0.752 |
|                                                  | BM B cells                                  | 2.93                          | 3.04      | 0.07                   | -0.30              | 0.58               | 0.571   | 0.807 |
|                                                  | BM T cells                                  | 5.00                          | 4.25      | -0.50                  | -1.50              | 0.50               | 0.345   | 0.752 |
|                                                  | BM macrophages                              | 5.50                          | 5.25      | 0.00                   | -1.00              | 0.50               | 0.462   | 0.752 |
|                                                  | BM plasmacytosis                            | 6.50                          | 5.50      | -0.50                  | -2.50              | 0.50               | 0.312   | 0.752 |
|                                                  | BM M:E ratio                                | 5.50                          | 5.50      | 0.00                   | -1.50              | 0.00               | 0.334   | 0.752 |
| Autopsy LN findings                              | LN sinus expansion                          | 6.00                          | 6.00      | 0.00                   | -0.50              | 0.50               | 0.838   | 0.956 |
|                                                  | LN sinus histiocytosis                      | 6.00                          | 6.00      | 0.00                   | -0.50              | 1.00               | 0.622   | 0.807 |
|                                                  | LN follicles                                | 6.50                          | 5.00      | -1.00                  | -2.00              | 0.00               | 0.167   | 0.752 |
|                                                  | LN germinal centers                         | 5.00                          | 0.00      | -1.50                  | -5.50              | 0.00               | 0.030   | 0.424 |
|                                                  | LN interfollicular expansion                | 3.50                          | 3.50      | 0.00                   | -0.50              | 0.50               | 0.677   | 0.835 |
|                                                  | LN plasmacytosis                            | 4.00                          | 2.00      | -1.50                  | -2.00              | 0.00               | 0.019   | 0.424 |
|                                                  | LN large atypical cells                     | 5.00                          | 6.00      | 1.00                   | 0.00               | 1.50               | 0.062   | 0.590 |

\*Median value for this histologic category.

Abbreviations and definitions: AST – aspartate aminotransferase, BM - bone marrow, FiO<sub>2</sub> - fraction of inspired oxygen, first – the first available clinical data on the patient at the time of hospitalization, INR - international normalised ratio, last – the last available clinical data on the patient prior to demise, LN – lymph node, m-score - the morphology score on a 8-point scale, PaO<sub>2</sub> - Partial pressure of oxygen, SOFA - Sequential Organ Failure Assessment, WBC – white blood cell .

Supplementary Table 2: Factors associated with LN plasmacytosis

|                                                  |                                                             | Median*                    |          | Wilcoxon Rank-Sum Test |                    |                    |         |       |
|--------------------------------------------------|-------------------------------------------------------------|----------------------------|----------|------------------------|--------------------|--------------------|---------|-------|
|                                                  |                                                             | LN Plasmacytosis           |          | Difference             | 95% CI Lower Bound | 95% CI Upper Bound | p-value | FDR   |
|                                                  |                                                             | Yes (N=20)                 | No (N=5) |                        |                    |                    |         |       |
| Overall Hospitalization parameters               | Hospitalization (days)                                      | 13.00                      | 3.00     | 9.00                   | -1.00              | 17.00              | 0.082   | 0.315 |
|                                                  | Highest body temperature (°C)                               | 39.05                      | 38.30    | 0.80                   | 0.00               | 1.70               | 0.071   | 0.315 |
| Laboratory Parameters at initial hospitalization | WBC count first (nl: 4.00-10.00 k/uL)                       | 6.02                       | 10.08    | -1.47                  | -6.68              | 4.27               | 0.488   | 0.719 |
|                                                  | Neutrophil count first (nl: 1.92-7.60 k/uL)                 | 4.16                       | 5.98     | -0.19                  | -4.08              | 3.71               | 0.921   | 0.988 |
|                                                  | Monocyte count first (nl: 0.16-1.10 k/uL)                   | 0.25                       | 0.80     | -0.47                  | -1.05              | -0.17              | 0.016   | 0.209 |
|                                                  | Lymphocyte count first (nl: 0.72-4.10 k/uL)                 | 0.59                       | 1.25     | -0.65                  | -1.39              | 0.13               | 0.096   | 0.315 |
|                                                  | Hemoglobin first (nl: 13.5-18.0 g/dL)                       | 12.10                      | 13.80    | -2.70                  | -7.00              | 0.70               | 0.110   | 0.343 |
|                                                  | Platelet count first (nl: 150-450 k/uL)                     | 155.50                     | 156.00   | 11.00                  | -59.00             | 57.00              | 0.717   | 0.909 |
|                                                  | Ferritin first (nl: 30-400 ug/L)                            | 456.50                     | 724.00   | -310.00                | -6358.00           | 286.00             | 0.257   | 0.542 |
|                                                  | AST first (nl: 10-50 U/L)                                   | 37.50                      | 70.00    | -32.90                 | -85.00             | 19.00              | 0.208   | 0.455 |
|                                                  | Total bilirubin first (nl: 0.0-1.0 mg/dL)                   | 0.40                       | 0.70     | -0.10                  | -1.20              | 0.30               | 0.430   | 0.705 |
|                                                  | Triglyceride first (nl: 35-150 mg/dL)                       | 255.00                     | 208.00   | 0.49                   | -1579.00           | 245.00             | 1.000   | 1.000 |
|                                                  | Creatinine first (nl: 0.50 - 1.20 mg/dL)                    | 1.30                       | 1.33     | -0.08                  | -2.10              | 0.94               | 0.812   | 0.952 |
|                                                  | C-reactive protein first (nl: 0-10 mg/L)                    | 118.10                     | 48.00    | 56.00                  | -47.80             | 181.80             | 0.306   | 0.583 |
|                                                  | INR first (nl: 0.9-1.1)                                     | 1.15                       | 1.25     | 0.00                   | -0.40              | 0.50               | 0.897   | 0.988 |
|                                                  | Fibrinogen first (nl: 200-450 mg/dL)                        | 572.00                     | 309.00   | 192.00                 | -217.00            | 407.00             | 0.479   | 0.719 |
|                                                  | Clinical Parameters at initial hospitalization              | Splenomegaly (0-no, 1-yes) | 1.00     | 1.00                   | 0.00               | 0.00               | 1.00    | 0.870 |
| FIO2 first (%)                                   |                                                             | 50.00                      | 100.00   | -26.57                 | -60.00             | 10.00              | 0.160   | 0.394 |
| Mean arterial pressure first (mmHg)              |                                                             | 92.50                      | 80.00    | 8.00                   | -28.00             | 23.00              | 0.614   | 0.861 |
| PaO2 first (nl: 65-95 mmHg)                      |                                                             | 91.50                      | 94.00    | 4.30                   | -17.00             | 68.00              | 0.958   | 0.989 |
| SOFA first                                       |                                                             | 6.50                       | 12.00    | -6.00                  | -12.00             | 1.00               | 0.081   | 0.315 |
| Laboratory Parameters at Demise                  | WBC count last (nl: 4.00-10.00 k/uL)                        | 11.06                      | 18.81    | -9.56                  | -51.90             | -1.45              | 0.018   | 0.209 |
|                                                  | Neutrophil count last (nl: 1.92-7.60 k/uL)                  | 7.62                       | 16.92    | -8.81                  | -31.14             | -1.37              | 0.023   | 0.224 |
|                                                  | Monocyte count last (nl: 0.16-1.10 k/uL)                    | 0.74                       | 1.14     | -0.63                  | -4.32              | 0.10               | 0.096   | 0.315 |
|                                                  | Lymphocyte count last (nl: 0.72-4.10 k/uL)                  | 0.70                       | 1.69     | -0.71                  | -1.95              | 0.46               | 0.175   | 0.397 |
|                                                  | Hemoglobin last (nl: 13.5-18.0 g/dL)                        | 8.65                       | 13.40    | -3.62                  | -8.40              | 0.20               | 0.075   | 0.315 |
|                                                  | Platelet count last (nl: 150-450 k/uL)                      | 189.00                     | 161.50   | 23.50                  | -105.00            | 234.00             | 0.627   | 0.861 |
|                                                  | Ferritin last (nl: 30-400 ug/L)                             | 662.00                     | 7922.00  | -6892.50               | -9032.00           | -343.00            | 0.033   | 0.278 |
|                                                  | AST last (nl: 10-50 U/L)                                    | 44.50                      | 389.00   | -344.32                | -1435.00           | -51.00             | 0.018   | 0.209 |
|                                                  | Total bilirubin last (nl: 0.0-1.0 mg/dL)                    | 0.50                       | 4.80     | -3.70                  | -4.60              | 0.00               | 0.060   | 0.315 |
|                                                  | Triglyceride last (nl: 35-150 mg/dL)                        | 212.00                     | 367.00   | -155.00                | -1198.00           | 135.00             | 0.295   | 0.583 |
|                                                  | Creatinine last (nl: 0.50 - 1.20 mg/dL)                     | 2.00                       | 2.97     | -0.84                  | -2.15              | 0.87               | 0.333   | 0.595 |
|                                                  | C-reactive protein last (nl: 0-10 mg/L)                     | 79.90                      | 202.05   | -63.84                 | -299.80            | 195.90             | 0.323   | 0.595 |
|                                                  | INR last (nl: 0.9-1.1)                                      | 1.30                       | 3.00     | -1.00                  | -2.80              | 1.30               | 0.086   | 0.315 |
|                                                  | Fibrinogen last (nl: 200-450 mg/dL)                         | 496.00                     | 412.00   | 145.50                 | -370.00            | 396.00             | 0.476   | 0.719 |
|                                                  | Clinical Parameters at Demise                               | FIO2 last (%)              | 60.00    | 51.00                  | 9.00               | -49.50             | 49.00   | 0.770 |
| Mean arterial pressure last (mmHg)               |                                                             | 75.00                      | 62.00    | 3.49                   | -43.00             | 52.00              | 0.823   | 0.952 |
| PaO2 last (nl: 65-95 mmHg)                       |                                                             | 73.00                      | 95.00    | -31.00                 | -61.00             | 14.00              | 0.154   | 0.394 |
| SOFA last                                        |                                                             | 11.00                      | 15.00    | -4.00                  | -8.00              | 3.00               | 0.169   | 0.397 |
| Autopsy BM findings                              | BM cellularity                                              | 77.50                      | 80.00    | -5.00                  | -20.00             | 10.00              | 0.535   | 0.770 |
|                                                  | BM lymphoid aggregates                                      | 0.00                       | 0.00     | 0.00                   | -1.00              | 0.00               | 0.383   | 0.646 |
|                                                  | BM B cells                                                  | 2.94                       | 3.32     | -0.39                  | -1.05              | 0.05               | 0.066   | 0.315 |
|                                                  | BM T cells                                                  | 4.50                       | 5.50     | -1.00                  | -2.00              | 0.50               | 0.122   | 0.361 |
|                                                  | BM Macrophages                                              | 5.25                       | 5.50     | -0.50                  | -1.50              | 0.00               | 0.147   | 0.394 |
|                                                  | BM plasmacytosis                                            | 2.00                       | 2.00     | 0.00                   | -1.00              | 2.00               | 0.915   | 0.988 |
|                                                  | BM M:E ratio                                                | 5.50                       | 5.50     | 0.00                   | -0.50              | 0.00               | 0.362   | 0.629 |
| Autopsy LN findings                              | LN sinuses expansion                                        | 6.00                       | 6.00     | 0.00                   | -0.50              | 0.50               | 0.972   | 0.989 |
|                                                  | LN sinus histiocytosis                                      | 6.00                       | 5.50     | 0.50                   | 0.00               | 1.00               | 0.144   | 0.394 |
|                                                  | LN follicles                                                | 5.50                       | 5.00     | 0.00                   | -1.50              | 1.50               | 0.972   | 0.989 |
|                                                  | LN germinal centers                                         | 0.50                       | 0.00     | 0.00                   | -3.50              | 1.50               | 0.686   | 0.909 |
|                                                  | LN interfollicular areas                                    | 3.50                       | 3.50     | 0.00                   | -1.00              | 0.50               | 0.748   | 0.919 |
|                                                  | LN plasmacytosis                                            | 6.50                       | 3.00     | 3.00                   | 2.00               | 4.00               | 0.001   | 0.035 |
|                                                  | LN large atypical cells/multinucleated/hyperchromatic cells | 5.50                       | 5.00     | 0.00                   | -1.00              | 1.50               | 0.700   | 0.909 |

\*Median value for this histologic category.

Abbreviations and definitions: AST – aspartate aminotransferase, BM - bone marrow, FiO<sub>2</sub> - fraction of inspired oxygen, first – the first available clinical data on the patient at the time of hospitalization, INR - international normalized ratio, last – the last available clinical data on the patient prior to demise, LN – lymph node, m-score - the morphology score on a 8-point scale, PaO<sub>2</sub> - Partial pressure of oxygen, SOFA - Sequential Organ Failure Assessment, WBC – white blood cell .
